# Supplementary material for: Systematic overexpression of genes encoded by mycobacteriophage Waterfoul reveals novel inhibitors of mycobacterial growth
Source: PubMed Central journal article supplement (PMC9339283; doi:10.1093/g3journal/jkac140), 2022-06-21
Supplement: jkac140_supplemental_table_1.pdf [file jkac140_supplemental_table_1.pdf]

**Supplemental Table 1: DNA oligos used in this study**

| <b>Oligo Name</b> | <b>Oligo Sequence (5' to 3')</b>                 |
|-------------------|--------------------------------------------------|
| oWaterfoul1_F     | atgcggaggaatcacttccatATGGAGCAAGCCATCAACG         |
| oWaterfoul1_R     | tgcaggatccgactcgagtgctgacTACGCGTCACCGATGATG      |
| oWaterfoul2_F     | atgcggaggaatcacttccatATGATCGGCATTGTCTCGCGTC      |
| oWaterfoul2_R     | tgcaggatccgactcgagtgctgacTCAAAGCTCTACCCCGCGC     |
| oWaterfoul3_F     | atgcggaggaatcacttccatATGACACCGACTGTCTGGCCG       |
| oWaterfoul3_R     | tgcaggatccgactcgagtgctgacTTACACGCGCGGCGGCCAG     |
| oWaterfoul5_F     | atgcggaggaatcacttccatATGGCTGCGAAGACAGAAGAC       |
| oWaterfoul5_R     | tgcaggatccgactcgagtgctgacTCAGACATCCTCGCCGTCTGAAC |
| oWaterfoul6_F     | atgcggaggaatcacttccatATGTCTAACCCGCGGCTGTCT       |
| oWaterfoul6_R     | tgcaggatccgactcgagtgctgacTCATGCGAACATCGCGCC      |
| oWaterfoul7_F     | atgcggaggaatcacttccatATGATTCCGCTGTTCATCGAG       |
| oWaterfoul7_R     | tgcaggatccgactcgagtgctgacTCACTCAGCCGTACTAGCG     |
| oWaterfoul8_F     | atgcggaggaatcacttccatATGCCGGAATTCAGGGGAC         |
| oWaterfoul8_R     | tgcaggatccgactcgagtgctgacTCACTGCAGATAATCCTCAGTC  |
| oWaterfoul9_F     | atgcggaggaatcacttccatATGACCGACATTGACGCGGTG       |
| oWaterfoul9_R     | tgcaggatccgactcgagtgctgacTACTCGGTGTCTCCGCG       |
| oWaterfoul10_F    | atgcggaggaatcacttccatATGCCCGATGACGTGACCG         |
| oWaterfoul10_R    | tgcaggatccgactcgagtgctgacTCAGCCGTTGCCGCGCAGTTC   |
| oWaterfoul11_F    | atgcggaggaatcacttccatATGGCCGACATCACGCGC          |
| oWaterfoul11_R    | tgcaggatccgactcgagtgctgacTCACTCGCCGTCTCTTCGG     |
| oWaterfoul12_F    | atgcggaggaatcacttccatATGCTGGCGACACTGGAC          |
| oWaterfoul12_R    | tgcaggatccgactcgagtgctgacTCAGTACCGCTCGCTGCC      |
| oWaterfoul13_F    | atgcggaggaatcacttccatATGTTCCCGACGCCGCAC          |
| oWaterfoul13_R    | tgcaggatccgactcgagtgctgacTCACTGAACGGGAATTCAGC    |
| oWaterfoul14_F    | atgcggaggaatcacttccatATGGGCCGGCTGGAATTC          |
| oWaterfoul14_R    | tgcaggatccgactcgagtgctgacTCACGTCTGCGGCCCGTG      |
| oWaterfoul15_F    | atgcggaggaatcacttccatATGACGGTGCTCGTGCCG          |
| oWaterfoul15_R    | tgcaggatccgactcgagtgctgacTCATCGGCGTGCGGTTTCAG    |
| oWaterfoul16_F    | atgcggaggaatcacttccatATGACTGCTCCCGTAGAGCC        |
| oWaterfoul16_R    | tgcaggatccgactcgagtgctgacTCAGACGGCGATGACGCCG     |
| oWaterfoul17_F    | atgcggaggaatcacttccatATGCCCAAGACCAAGAACGAAG      |
| oWaterfoul17_R    | tgcaggatccgactcgagtgctgacTCACCTGCCGCGCCGCCGCGCAG |
| oWaterfoul18_F    | atgcggaggaatcacttccatATGCCCAAGACCAAGAACG         |
| oWaterfoul18_R    | tgcaggatccgactcgagtgctgacTCACTTGTCTTGCCTTCCAAC   |
| oWaterfoul19_F    | atgcggaggaatcacttccatATGGCTGAAGCGAAGTATTACC      |
| oWaterfoul19_R    | tgcaggatccgactcgagtgctgacTCATCGCAGATGTGTTGTTCCG  |

|                |                                                    |
|----------------|----------------------------------------------------|
| oWaterfoul20_F | atgcggaggaatcacttccatATGTCTGGGCTTCACGATGATTG       |
| oWaterfoul20_R | tgcaggatccgactcgagtgtcgacTCACGCCACGCCATCTCG        |
| oWaterfoul21_F | atgcggaggaatcacttccatATGATTTTGACTGTTCCCAACC        |
| oWaterfoul21_R | tgcaggatccgactcgagtgtcgacTCAGAACAGGTCTCCTGATCCG    |
| oWaterfoul22_F | atgcggaggaatcacttccatATGGAAGTGCAGCACATGC           |
| oWaterfoul22_R | tgcaggatccgactcgagtgtcgacTCATTCGGTGGACTCCTCG       |
| oWaterfoul23_F | atgcggaggaatcacttccatATGACGAAGATCGCAACGAC          |
| oWaterfoul23_R | tgcaggatccgactcgagtgtcgacTCAGAGCCCCTGCGGAAC        |
| oWaterfoul24_F | atgcggaggaatcacttccatATGGGCGCCTCGAAGCAAT           |
| oWaterfoul24_R | tgcaggatccgactcgagtgtcgacTCATACGCTCTTGGCATGCG      |
| oWaterfoul25_F | atgcggaggaatcacttccatATGCCAAGAGCGTATGACC           |
| oWaterfoul25_R | tgcaggatccgactcgagtgtcgacTCACAGGTCCATCATTTCAAAGTTG |
| oWaterfoul26_F | atgcggaggaatcacttccatATGCTGGAAATCAGAAAGCAACTC      |
| oWaterfoul26_R | tgcaggatccgactcgagtgtcgacTCAAGAGACCACGCCACCG       |
| oWaterfoul27_F | atgcggaggaatcacttccatATGGCGTGGTCTCTTGACC           |
| oWaterfoul27_R | tgcaggatccgactcgagtgtcgacTTACTGGTATGCGACGCACCA     |
| oWaterfoul28_F | atgcggaggaatcacttccatATGTCGGAATATCAAGCCGCG         |
| oWaterfoul28_R | tgcaggatccgactcgagtgtcgacCTACTCGCCGCGTACTTGAA      |
| oWaterfoul29_F | atgcggaggaatcacttccatATGGACGTGACACGCGG             |
| oWaterfoul29_R | tgcaggatccgactcgagtgtcgacTCACGCAGTCACACCCTTG       |
| oWaterfoul30_F | atgcggaggaatcacttccatATGAGCAAGCCAATGTTGTTGACC      |
| oWaterfoul30_R | tgcaggatccgactcgagtgtcgacTCATGCCGCCATCGCCCCG       |
| oWaterfoul31_F | atgcggaggaatcacttccatATGACCTCGGGCGCTGATAG          |
| oWaterfoul31_R | tgcaggatccgactcgagtgtcgacTCACGCGCAACCTGCC          |
| oWaterfoul32_F | atgcggaggaatcacttccatATGACTGGCAGTGCGGTG            |
| oWaterfoul32_R | tgcaggatccgactcgagtgtcgacTCAGCCAGATTCACGGGC        |
| oWaterfoul33_F | atgcggaggaatcacttccatATGAATCTGGCTGAACATCTCGG       |
| oWaterfoul33_R | tgcaggatccgactcgagtgtcgacTCAGACAGCGACGACACGC       |
| oWaterfoul34_F | atgcggaggaatcacttccatATGTCGTCGCTGTCTGAGC           |
| oWaterfoul34_R | tgcaggatccgactcgagtgtcgacCTACACGATCCCCATGCGC       |
| oWaterfoul35_F | atgcggaggaatcacttccatATGCGTGGCGAACATGCAATG         |
| oWaterfoul35_R | tgcaggatccgactcgagtgtcgacTCACAGGTGACCGTCCGC        |
| oWaterfoul36_F | atgcggaggaatcacttccatATGAGGCTGTACCCGAAGC           |
| oWaterfoul36_R | tgcaggatccgactcgagtgtcgacTCAGCCGCGCGCATGGTC        |
| oWaterfoul37_F | atgcggaggaatcacttccatATGCGCGCGGCTGATCG             |
| oWaterfoul37_R | tgcaggatccgactcgagtgtcgacTCAGCGACGAACGACGTCAG      |
| oWaterfoul38_F | atgcggaggaatcacttccatATGACTACGGGAACGATCGACT        |
| oWaterfoul38_R | tgcaggatccgactcgagtgtcgacTCACCGCGATCTTTTTTGCC      |
| oWaterfoul39_F | atgcggaggaatcacttccatATGCGCGCCATCATTTACAACC        |

|                |                                                    |
|----------------|----------------------------------------------------|
| oWaterfoul39_R | tgcaggatccgactcgagtgctgcacTCACGCATCAGCGTGCGGG      |
| oWaterfoul40_F | atgcggaggaatcacttccatATGACAGGGCAGCGGCTC            |
| oWaterfoul40_R | tgcaggatccgactcgagtgctgcacCTACGCGGGGGTTGCTT        |
| oWaterfoul41_F | atgcggaggaatcacttccatATGACGCTTGACCTCATCGC          |
| oWaterfoul41_R | tgcaggatccgactcgagtgctgcacTTAAAGCGGGCGCGGGCTCGT    |
| oWaterfoul42_F | atgcggaggaatcacttccatATGACCATGAGTAGCGACTAC         |
| oWaterfoul42_R | tgcaggatccgactcgagtgctgcacTCACAGAGGATCTGCGTCACC    |
| oWaterfoul43_F | atgcggaggaatcacttccatATGTCCGCTTTTCCGGTCATC         |
| oWaterfoul43_R | tgcaggatccgactcgagtgctgcacTCAACCTGCCGTTTCGTC       |
| oWaterfoul44_F | atgcggaggaatcacttccatATGTTGGGACAACAACACCGG         |
| oWaterfoul44_R | tgcaggatccgactcgagtgctgcacTTATCCGAGCGGTCCATGTC     |
| oWaterfoul45_F | atgcggaggaatcacttccatATGTCGAAACCAAGTATAAACACGA     |
| oWaterfoul45_R | tgcaggatccgactcgagtgctgcacTCACAGCAGACCTACGGACA     |
| oWaterfoul46_F | atgcggaggaatcacttccatATGAGCACCATCACCGAAATTCG       |
| oWaterfoul46_R | tgcaggatccgactcgagtgctgcacTCAGCCGACCGCTGCGTGTT     |
| oWaterfoul47_F | atgcggaggaatcacttccatATGACCAGCCACGCAATGC           |
| oWaterfoul47_R | tgcaggatccgactcgagtgctgcacCTACGGTGCGCCAGCGTC       |
| oWaterfoul48_F | atgcggaggaatcacttccatATGTTGACCATCAACACCGCAGAC      |
| oWaterfoul48_R | tgcaggatccgactcgagtgctgcacCTACTTGCCGTCGTCGCC       |
| oWaterfoul49_F | atgcggaggaatcacttccatATGAAGAAGCGCATTGCAATCGT       |
| oWaterfoul49_R | tgcaggatccgactcgagtgctgcacTCAGTCCCGGGGTGAC         |
| oWaterfoul50_F | atgcggaggaatcacttccatATGAGCAGCGGTGAACGC            |
| oWaterfoul50_R | tgcaggatccgactcgagtgctgcacTCATTGGTTCACTTCTCGTTGTAG |
| oWaterfoul51_F | atgcggaggaatcacttccatATGACCGACATCGCGACAGT          |
| oWaterfoul51_R | tgcaggatccgactcgagtgctgcacTCACTCTGCAAGCTCGATCC     |
| oWaterfoul52_F | atgcggaggaatcacttccatATGACTGAGTTTGTGCTCGCC         |
| oWaterfoul52_R | tgcaggatccgactcgagtgctgcacTTACTTGAACGGCCGACGAT     |
| oWaterfoul53_F | atgcggaggaatcacttccatATGAGGGTCAACGGCGC             |
| oWaterfoul53_R | tgcaggatccgactcgagtgctgcacTACTCGGTGCTCATGTGGTGC    |
| oWaterfoul54_F | atgcggaggaatcacttccatATGAAGCGAAACAAAGAGAAGC        |
| oWaterfoul54_R | tgcaggatccgactcgagtgctgcacTCATCTCGCCACAACCTCG      |
| oWaterfoul55_F | atgcggaggaatcacttccatATGAGCCAGGAATTCGTGATGAT       |
| oWaterfoul55_R | tgcaggatccgactcgagtgctgcacTCACTGCTCCGCCCCAC        |
| oWaterfoul56_F | atgcggaggaatcacttccatATGAAAGCCACCTTGCGGC           |
| oWaterfoul56_R | tgcaggatccgactcgagtgctgcacTCATGAAAGCATCCCCTTAATCCA |
| oWaterfoul57_F | atgcggaggaatcacttccatATGACGAACGGGACGGCC            |
| oWaterfoul57_R | tgcaggatccgactcgagtgctgcacTCACGACACACCGCCACG       |
| oWaterfoul58_F | atgcggaggaatcacttccatATGACGGCCCCGAACGTG            |
| oWaterfoul58_R | tgcaggatccgactcgagtgctgcacTCACGACTCCACCTCACGGT     |

|                |                                                   |
|----------------|---------------------------------------------------|
| oWaterfoul59_F | atgcggaggaatcacttccatATGAGCGCGGCAACGTTTC          |
| oWaterfoul59_R | tgcaggatccgactcgagtgctgacTTACGGGCAGTCGCCGGC       |
| oWaterfoul60_F | atgcggaggaatcacttccatATGGCCGATCACTACTGCAC         |
| oWaterfoul60_R | tgcaggatccgactcgagtgctgacTTATGTGCCGTCGTAATAGTCGGG |
| oWaterfoul61_F | atgcggaggaatcacttccatATGACGAACGCATCGAAGCAATTC     |
| oWaterfoul61_R | tgcaggatccgactcgagtgctgacTTACTGCTTGAGCATCCCGAGTTC |
| oWaterfoul62_F | atgcggaggaatcacttccatATGATCACCATTTACACAACCGGC     |
| oWaterfoul62_R | tgcaggatccgactcgagtgctgacTCACGGGTTGATCCCCCGC      |
| oWaterfoul63_F | atgcggaggaatcacttccatATGACCGTGCGCAGAGGAA          |
| oWaterfoul63_R | tgcaggatccgactcgagtgctgacTCATTTAGGTGACCCCAGTTCG   |
| oWaterfoul64_F | atgcggaggaatcacttccatATGAGCGACCCGCGCAACAT         |
| oWaterfoul64_R | tgcaggatccgactcgagtgctgacTCAGAGTGTGTGCGAACCTG     |
| oWaterfoul65_F | atgcggaggaatcacttccatATGACCCTGACCATCCCTG          |
| oWaterfoul65_R | tgcaggatccgactcgagtgctgacTCACTCGTCTTCGCTTTCTG     |
| oWaterfoul66_F | atgcggaggaatcacttccatATGACCGGCCAGGAACGG           |
| oWaterfoul66_R | tgcaggatccgactcgagtgctgacTCAGCTCGCCACTCGAC        |
| oWaterfoul67_F | atgcggaggaatcacttccatATGGGCCGACCATGCGA            |
| oWaterfoul67_R | tgcaggatccgactcgagtgctgacTCAGTGAGTCACCTTCTCGCC    |
| oWaterfoul68_F | atgcggaggaatcacttccatATGCCCCGCACATGCGG            |
| oWaterfoul68_R | tgcaggatccgactcgagtgctgacTCAACACGCTGCCGGCG        |
| oWaterfoul69_F | atgcggaggaatcacttccatATGCAGATTTGCGAACTGTTAC       |
| oWaterfoul69_R | tgcaggatccgactcgagtgctgacTTACGCGTGGACGTTGCCG      |
| oWaterfoul70_F | atgcggaggaatcacttccatATGCTGAAGAACATCCTGAAGGC      |
| oWaterfoul70_R | tgcaggatccgactcgagtgctgacTCATGCCGGCTGCGCTTC       |
| oWaterfoul71_F | atgcggaggaatcacttccatATGACCGCACACCCGATG           |
| oWaterfoul71_R | tgcaggatccgactcgagtgctgacTCATGCGTTCACTTCTCACG     |
| oWaterfoul72_F | atgcggaggaatcacttccatATGACTGTCGGCGAACTAATCG       |
| oWaterfoul72_R | tgcaggatccgactcgagtgctgacTCACAGTTCCCTCACATCCGAC   |
| oWaterfoul73_F | atgcggaggaatcacttccatATGACCGCCCCGAACTATC          |
| oWaterfoul73_R | tgcaggatccgactcgagtgctgacTCATTGCGCGCACACAC        |
| oWaterfoul74_F | atgcggaggaatcacttccatATGACCGCGCCAAGCGAG           |
| oWaterfoul74_R | tgcaggatccgactcgagtgctgacCTATCTGTGTCGTGCACGTTGT   |
| oWaterfoul75_F | atgcggaggaatcacttccatATGAGCGTCGCTGAGCAGT          |
| oWaterfoul75_R | tgcaggatccgactcgagtgctgacTCACCACAGGGCGCCTTG       |
| oWaterfoul76_F | atgcggaggaatcacttccatATGCTGAGCGTTGAACCCG          |
| oWaterfoul76_R | tgcaggatccgactcgagtgctgacTCACTTGGGTTCTGATCGGTTCG  |
| oWaterfoul77_F | atgcggaggaatcacttccatATGGGGAAACACAGCGCG           |
| oWaterfoul77_R | tgcaggatccgactcgagtgctgacTTACCCGTTGTCGGCCTG       |
| oWaterfoul78_F | atgcggaggaatcacttccatATGCGCAAATACCGAGTCTGTT       |

|                |                                                                                                                    |
|----------------|--------------------------------------------------------------------------------------------------------------------|
| oWaterfoul78_R | tgcaggatccgactcgagtgctgacTCACTGCCGGGCCGCTT                                                                         |
| oWaterfoul79_F | atgcggaggaatcacttccatATGACCTACATCGAAGTGCGC                                                                         |
| oWaterfoul79_R | tgcaggatccgactcgagtgctgacTCACCAGCTGCCGTCTC                                                                         |
| oWaterfoul80_F | atgcggaggaatcacttccatATGAGCGCCACGCAAGGC                                                                            |
| oWaterfoul80_R | tgcaggatccgactcgagtgctgacTTACGGTTGCAGTCCTTGAA                                                                      |
| oWaterfoul81_F | atgcggaggaatcacttccatATGGGCAAGCACAGCATGG                                                                           |
| oWaterfoul81_R | tgcaggatccgactcgagtgctgacTCAGCCATGCCGCAACAC                                                                        |
| oWaterfoul82_F | atgcggaggaatcacttccatATGGCTGACAAGAACGACGAA                                                                         |
| oWaterfoul82_R | tgcaggatccgactcgagtgctgacTCACGCCATTGCGTCAC                                                                         |
| oWaterfoul83_F | atgcggaggaatcacttccatATGGGCGTGACACGCGCAG                                                                           |
| oWaterfoul83_R | tgcaggatccgactcgagtgctgacTCATTTGGTTTTCTCAATCCCAT                                                                   |
| oWaterfoul84_F | atgcggaggaatcacttccatATGACCGACACGCAACATGC                                                                          |
| oWaterfoul84_R | tgcaggatccgactcgagtgctgacTCAGGCAGTGCCGAACAGTC                                                                      |
| oWaterfoul85_F | atgcggaggaatcacttccatATGAAGAACAACACCGCTCAGC                                                                        |
| oWaterfoul85_R | tgcaggatccgactcgagtgctgacTTAGATCCGGGCGGCGCG                                                                        |
| oWaterfoul86_F | atgcggaggaatcacttccatATGGCGAAATGGACACACGA                                                                          |
| oWaterfoul86_R | tgcaggatccgactcgagtgctgacCTACTCTCTTCTGGTAGATCC                                                                     |
| oWaterfoul87_F | atgcggaggaatcacttccatATGATGAGTAAGCAAACCCGCG                                                                        |
| oWaterfoul87_R | tgcaggatccgactcgagtgctgacTTACCCGGCGCTTTGCATG                                                                       |
| oWaterfoul88_F | atgcggaggaatcacttccatATGACGAACTGGACCAAGACC                                                                         |
| oWaterfoul88_R | tgcaggatccgactcgagtgctgacTTACTTCTTCGGCAGCTTGTGC                                                                    |
| oWaterfoul89_F | atgcggaggaatcacttccatATGTTCAAGATGATCGTTCAACTTC                                                                     |
| oWaterfoul89_R | tgcaggatccgactcgagtgctgacTCAGGCGGCCGGCACGC                                                                         |
| oWaterfoul90_F | atgcggaggaatcacttccatATGCCGCTCATCATCTCCC                                                                           |
| oWaterfoul90_R | tgcaggatccgactcgagtgctgacTCAGATGTGGTTGCGGCC                                                                        |
| oWaterfoul91_F | atgcggaggaatcacttccatATGACCACGATCGACACTCGC                                                                         |
| oWaterfoul91_R | tgcaggatccgactcgagtgctgacTCAGGCGCCTAGCGCTGG                                                                        |
| oWaterfoul92_F | atgcggaggaatcacttccatATGATCGCCACCGCAACC                                                                            |
| oWaterfoul92_R | tgcaggatccgactcgagtgctgacTCAGGCCATGATGAATCCGAC                                                                     |
| oWaterfoul93_F | atgcggaggaatcacttccatATGAACCGGAACCAAGAGC                                                                           |
| oWaterfoul93_R | tgcaggatccgactcgagtgctgacCTACGTATGCGCGGCCGG                                                                        |
| oWaterfoul94_F | atgcggaggaatcacttccatATGGCCGGCCACGAACAC                                                                            |
| oWaterfoul94_R | tgcaggatccgactcgagtgctgacTCATGGCCTGTATGGCTCG                                                                       |
| oWaterfoul95_F | atgcggaggaatcacttccatATGACAGTCACGCGCAGC                                                                            |
| oWaterfoul95_R | tgcaggatccgactcgagtgctgacTTACGGCTTCCATTGCGGG                                                                       |
| oDH117         | atgGAAGTGATTCTCCGCATG                                                                                              |
| oDH152         | catgcggaggaatcacttccatagttagtgaGTCGACACTCGAGTCGGATCCTGCAGGAAGCTTGAT<br>CCGATAACACAGGAACAGATCTatggtctcgaagggcgaggag |
| oDH153         | aagctatcagttaactaaaacg                                                                                             |
| oDH154         | tcgttttagttaactgatagcttttacttgtacagctcgtccatgc                                                                     |

|                               |                                               |
|-------------------------------|-----------------------------------------------|
| pExTra_F                      | GTCGACACTCGAGTCGGATCCTG                       |
| pExTra_R                      | ATGGAAGTGATTCCTCCGCATGC                       |
| pExTra_seqF                   | GTACCCGTGTGTACGACCAGC                         |
| pExTra_uniR                   | CCCTTCGAGACCATAGATCTGTTCC                     |
| oWaterfoul8_int<br>ernalseq1  | GCAAGCCAGGCCGCGCCACGG                         |
| oWaterfoul8_int<br>ernalseq2  | GACGCGGTGGCTGATTGG                            |
| oWaterfoul19_i<br>nternalseq1 | CAGACGTCGGGCAAGGCGTTC                         |
| oWaterfoul19_i<br>nternalseq2 | TTCGTCGCTGACAACGCATC                          |
| oWaterfoul19_i<br>nternalseq3 | TGGCGTAGCCCGACAGTG                            |
| oWaterfoul19_i<br>nternalseq4 | TCTTCACGGAGTTCAGTGAGCC                        |
| oWaterfoul21_i<br>nternalseq  | CTGACGGTGCTCATGGC                             |
| oWaterfoul25_i<br>nternalseq1 | ACACGATCGTGACGTCTGAACG                        |
| oWaterfoul25_i<br>nternalseq2 | ACAGCGGCGGTGACTGCTCG                          |
| oWaterfoul29_i<br>nternalseq1 | CATCGTGTATTTCTGTGG                            |
| oWaterfoul65_i<br>nternalseq1 | ACGCTGACGCAGCCACCGAC                          |
| oWaterfoul65_i<br>nternalseq2 | ACGAACCGTTGATGCCGG                            |
| oWaterfoul66_i<br>nternalseq1 | CAAGTTCGTCACTGCCGCG                           |
| oFruitloop52_F                | atgCGgaggaatcacttccatATGCTAACCCAGATTCTAAACCCG |
| oFruitiitloop52_R             | tgcaggatccgactcgagtgtcgacTCATGCTGCGTCTCCCTCG  |
